# Supplementary material for: Factors influencing the meridional width of the equatorial deep jets
Source: Copernicus journal article supplement (doi:10.5194/egusphere-2023-50), 2023-01-23

0°N, 23°W

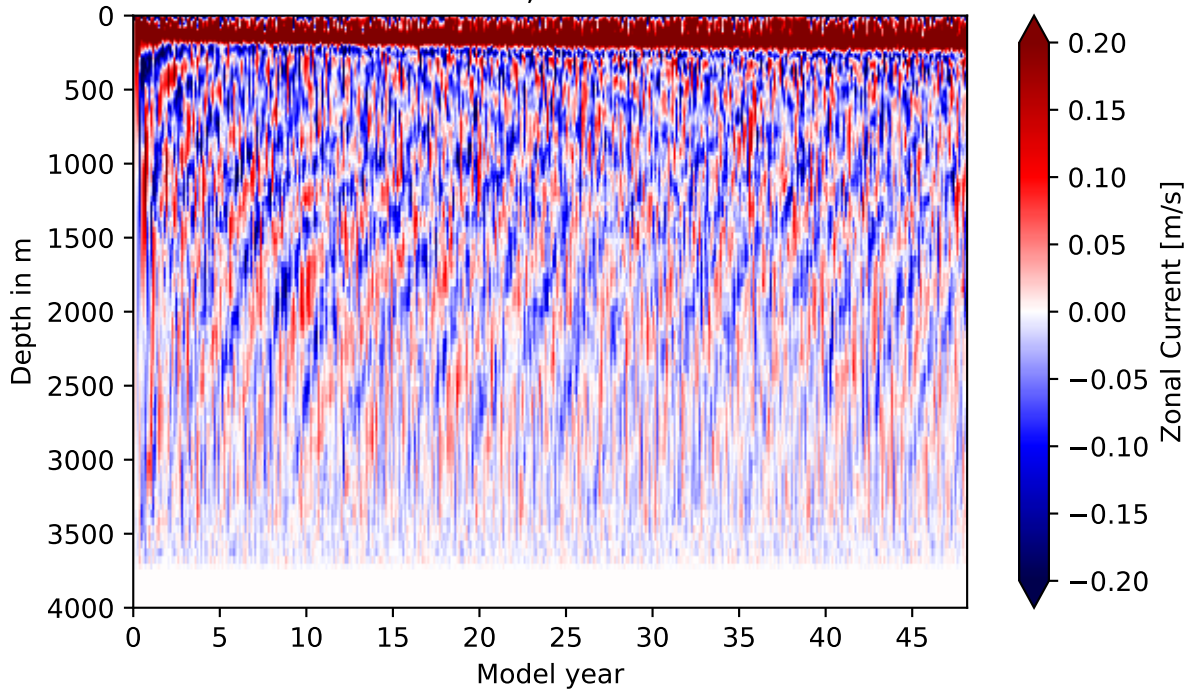

Supplement: Supplementary file [file egusphere-2023-50-AC2-supplement.pdf]
